# Supplementary material for: Well-dispersed Pt/RuO2-decorated mesoporous N-doped carbon as a hybrid electrocatalyst for Li–O2 batteries
Source: Royal Society of Chemistry journal article supplement (doi:10.1039/d1ra00740h), 2021-01-01
Supplement: d1ra00740h1.pdf [file d1ra00740h1.pdf]

## Supplementary Information

### **Well-dispersed Pt/RuO<sub>2</sub>-Decorated Mesoporous N-doped Carbon as a Hybrid Electrocatalyst for Li-O<sub>2</sub> Batteries**

Hyun-Gi Jo, Kue-Ho Kim, and Hyo-Jin Ahn\*

*Department of Materials Science and Engineering, Seoul National University of  
Science and Technology, Seoul 01811, Korea*

\*Corresponding author. Tel.: +82029706622; Fax: +82029736657

Email address: hjahn@seoultech.ac.kr (H.-J. Ahn)

## Figures

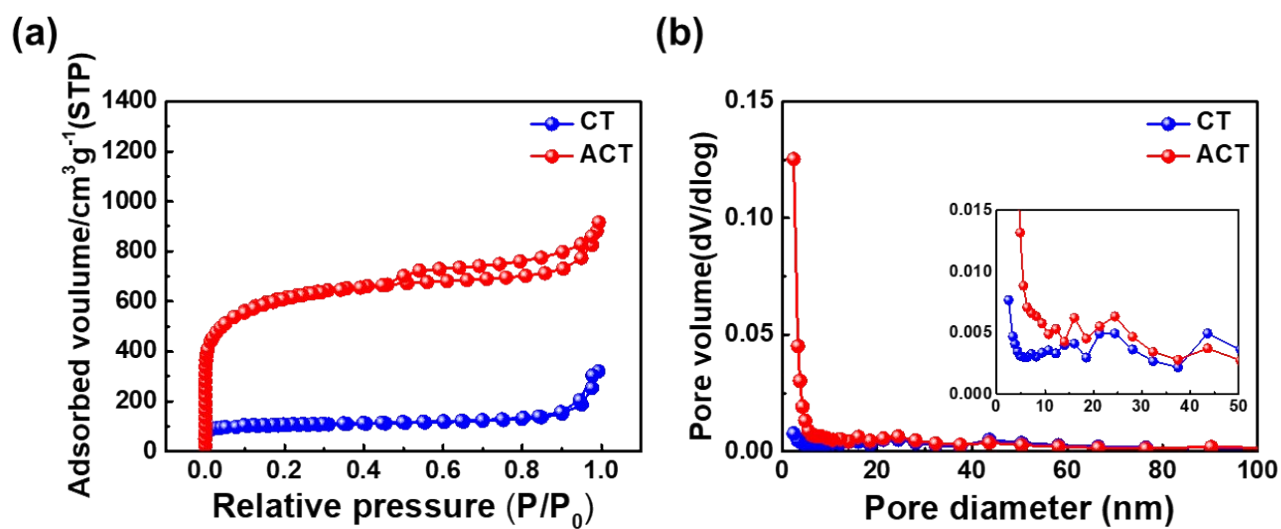

**Fig. S1** (a) N<sub>2</sub> adsorption/desorption BET and (b) BJH pore diameter distributions isotherms obtain from CT and ACT.

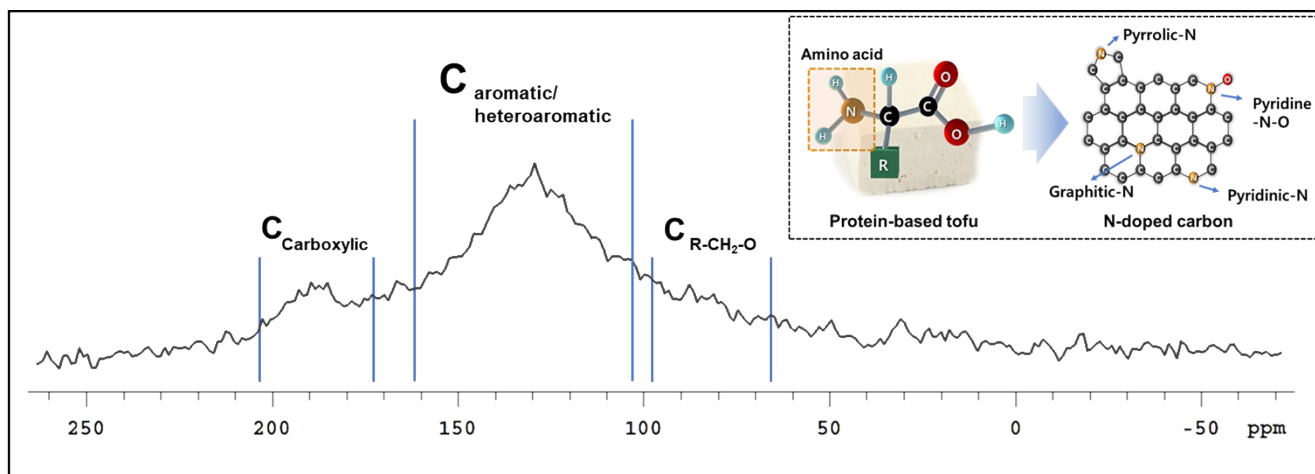

**Fig. S2**  $^{13}\text{C}$  solid-state MAS NMR spectrum of ACT

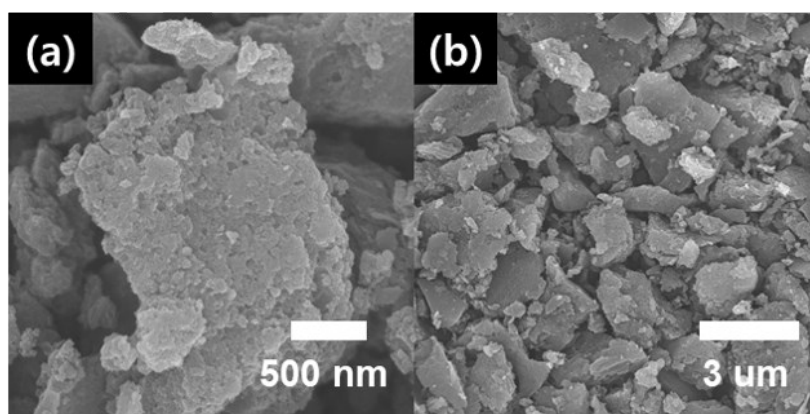

**Fig. S3** (a)Low- and (b) high-resolution FESEM images of CT.

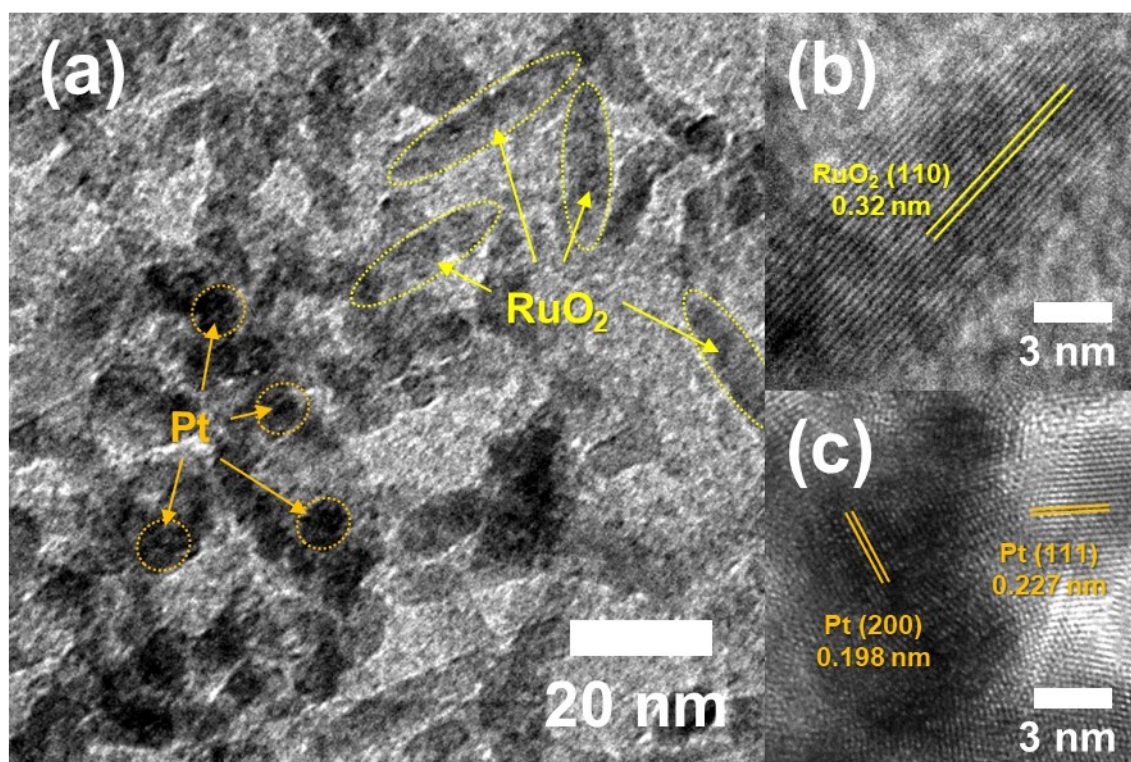

**Fig. S4** (a-c) High-resolution TEM images of Pt/RuO<sub>2</sub>@ACT

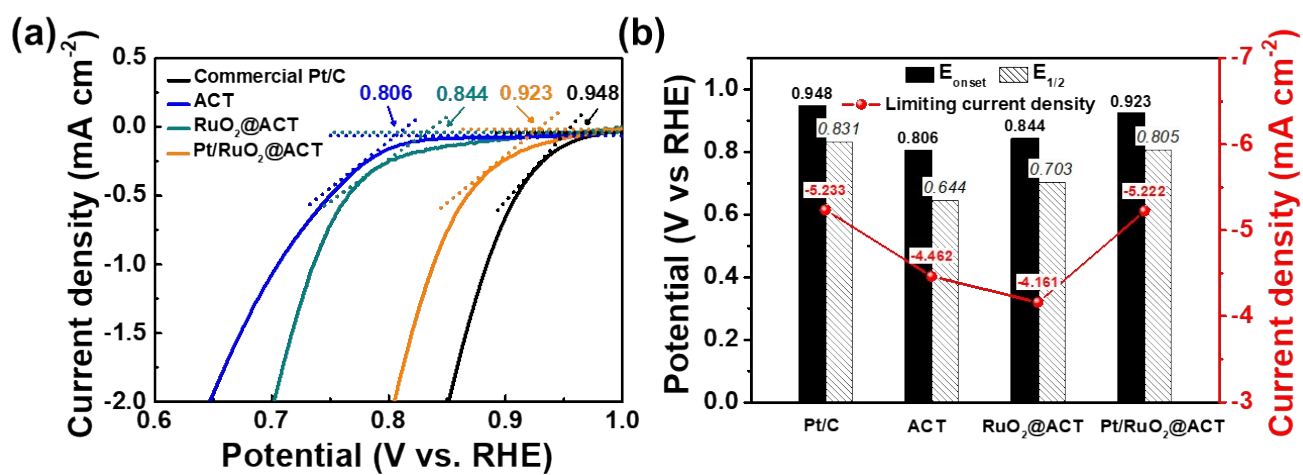

**Fig. S5** (a)  $E_{\text{onset}}$  determination in expanded LSV curves, and (b) the comparison of  $E_{\text{onset}}$ ,  $E_{1/2}$ , and Limiting current density (V vs RHE) of commercial Pt/C, ACT, RuO<sub>2</sub>@ACT, and Pt/RuO<sub>2</sub>@ACT.

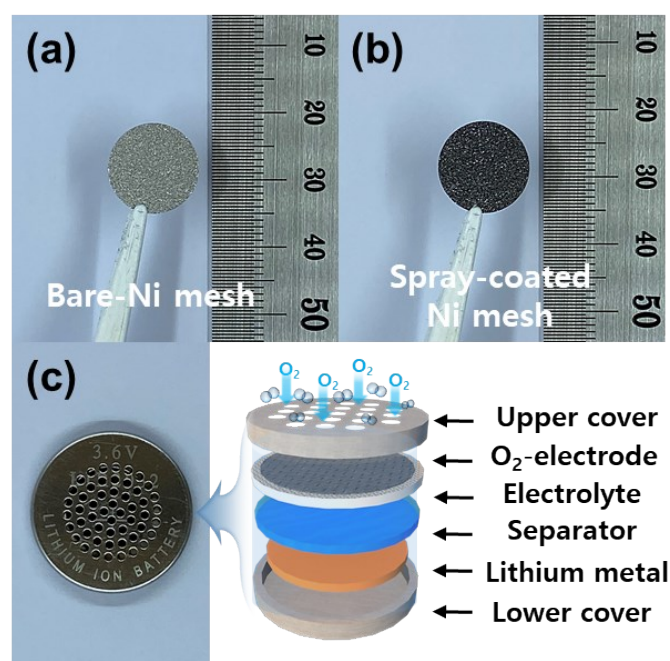

**Fig. S6** Photograph of (a) Bare-Ni mesh, (b) Spray-coated Ni mesh by spray coating method, and (c) photograph and component diagram of the assembled cell

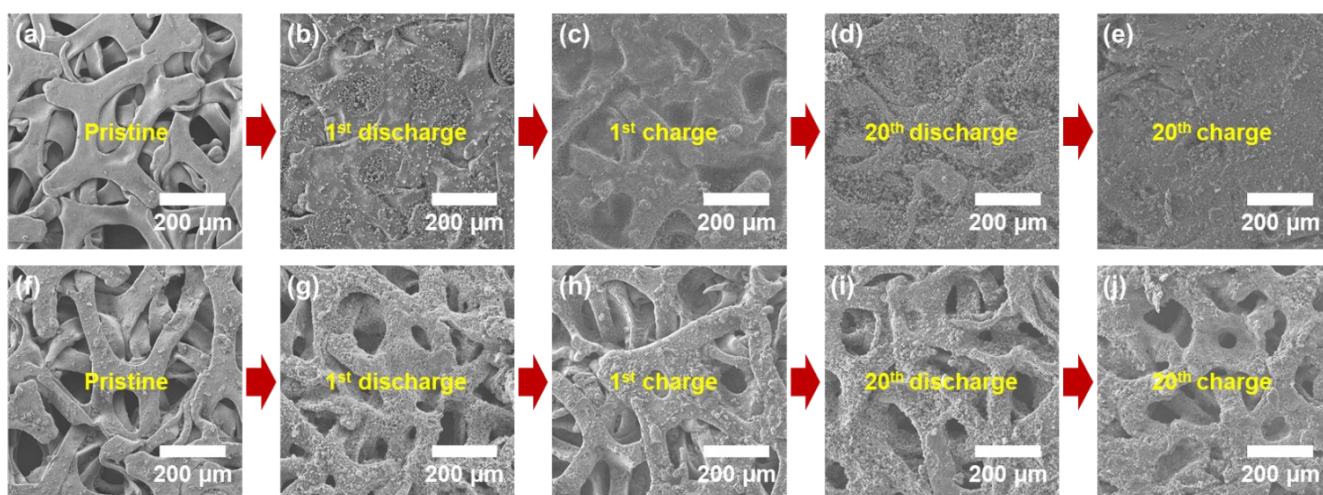

**Fig. S7** SEM images of KB and Pt/RuO<sub>2</sub>@ACT O<sub>2</sub>-electrodes loaded on the Ni substrate at various discharge-charge states: (a, f) pristine electrode, (b, g) 1<sup>st</sup> discharge, (c, h) 1<sup>st</sup> charge, (d, i) 20<sup>th</sup> discharge, and (e, j) 20<sup>th</sup> charge.



## Tables

| Samples | $S_{\text{BET}}$<br>( $\text{m}^2 \text{ g}^{-1}$ ) | Total pore<br>volume<br>( $p/p_0=0.990$ )<br>( $\text{cm}^3 \text{ g}^{-1}$ ) | Average pore<br>diameter (nm) | Pore size distribution    |                          |
|---------|-----------------------------------------------------|-------------------------------------------------------------------------------|-------------------------------|---------------------------|--------------------------|
|         |                                                     |                                                                               |                               | $V_{\text{micro}}$<br>(%) | $V_{\text{meso}}$<br>(%) |
| CT      | 393.7                                               | 0.48                                                                          | 4.88                          | -                         | -                        |
| ACT     | 2241.6                                              | 1.38                                                                          | 2.46                          | 55%                       | 45%                      |

**Table. S1** Summarized BET and BJH results of CT and ACT samples.

| Sample | Element contents (wt %) |      |      |      |      |      |
|--------|-------------------------|------|------|------|------|------|
|        | C                       | H    | O    | N    | S    | P    |
| ACT    | 79.79                   | 0.10 | 7.81 | 1.79 | 0.14 | 0.01 |

**Table. S2** Summarized EA and ICP-AES results of ACT.
